# Supplementary material for: Structure-guided design of pure orthosteric inhibitors of αIIbβ3 that prevent thrombosis but preserve hemostasis
Source: PubMed Central journal article supplement (PMC6972956; doi:10.1038/s41467-019-13928-2), 2020-01-21
Supplement: 41467_2019_13928_MOESM1_ESM.pdf [file 41467_2019_13928_MOESM1_ESM.pdf]

**Supplementary Information**

**Structure-guided design of novel orthosteric inhibitors of  $\alpha\text{IIb}\beta\text{3}$  that prevent thrombosis but preserve hemostasis**

Brian D. Adair, José L. Alonso, Johannes van Agthoven, Vincent Hayes, Hyun Sook Ahn,  
I-Shing Yu, Shu-Wha Lin, Jian-Ping Xiong, Mortimer Poncz,  
M. Amin Arnaout

a 77024#734-819 RT:5.73-6.36 AV: 43 NL:1.51E7  
F: FTMS + c NSI Full ms [500.00-2000.00]

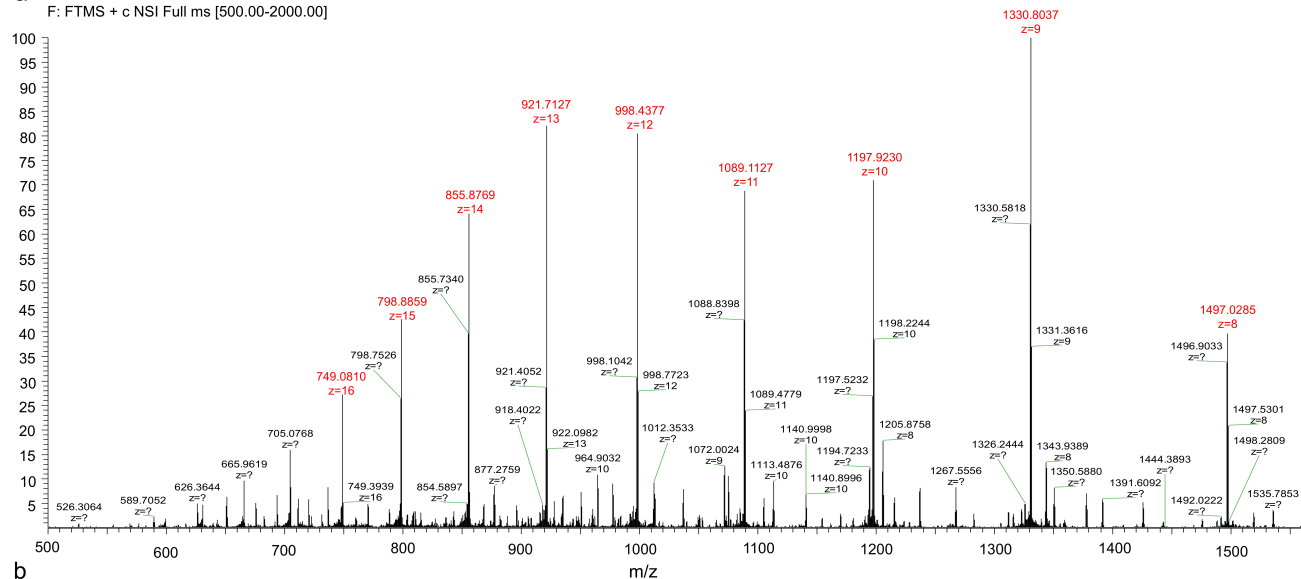

b

| Sample : Hr10 |             |        |            |
|---------------|-------------|--------|------------|
|               | m/z         | Charge | mass       |
| m/z_largest   | 1497.0285   | 8      | 11968.228  |
| m/z_2         | 1330.8037   | 9      | 11968.2333 |
| m/z_3         | 1197.9230   | 10     | 11969.23   |
| m/z_4         | 1089.1127   | 11     | 11969.2397 |
| m/z_5         | 998.4377    | 12     | 11969.2524 |
| m/z_6         | 921.7127    | 13     | 11969.2651 |
| m/z_7         | 855.8769    | 14     | 11968.2766 |
| m/z_8         | 798.8859    | 15     | 11968.2885 |
| m/z_9         | 749.0810    | 16     | 11969.296  |
| Average mass  |             | SD     |            |
|               | 11,968.8122 | 0.528  |            |

**Supplementary Figure 1. Mass spectroscopy analysis of Hr10.** a) The mass spectrum from the intact Hr10 sample. Major peaks are displayed with assigned charges. b) Table of the largest peaks showing the m/z ratios for the largest peaks, the calculated charge and resulting molecular weight. The molecular weight calculated from nine peaks is  $119868.9 \pm 0.5$  (mean  $\pm$  S.D.) as compared to the calculated molecular weight of the protein lacking the N-terminal Met and with a single L-Har substitution (11,969.3). Peaks corresponding to the protein with Arg at 1493 could not be identified (not shown).

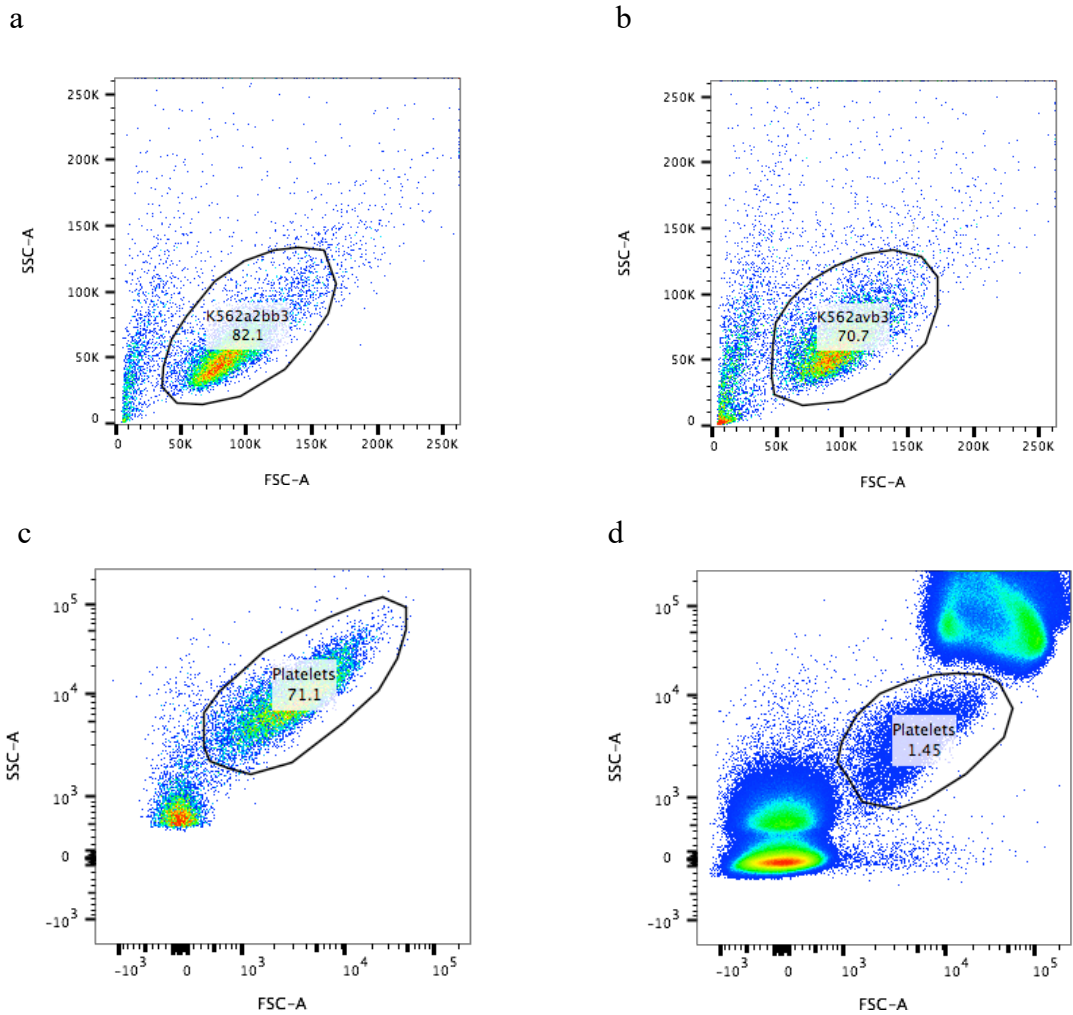

**Supplementary Figure 2. Gating strategies used for ligand binding studies.** a) Gating strategy for live stable  $\alpha$ IIB $\beta$ 3-K562 cells used in FACS analysis presented in Fig. 2a, 2b *inset*, 2c, Fig.5c, Fig.7c and Fig.8c, d. b) Gating strategy for live stable  $\alpha$ V $\beta$ 3-K562 cells used in FACS analysis presented in Fig. 2b, 2b *inset* and Supplementary Fig.5. c) Gating strategy for fresh human platelets in PRP used in FACS analysis presented in Fig.2d 2d *inset* and Fig.8a. d) Gating strategy for fresh human platelets in whole blood used in FACS analysis presented in Fig. 4f.

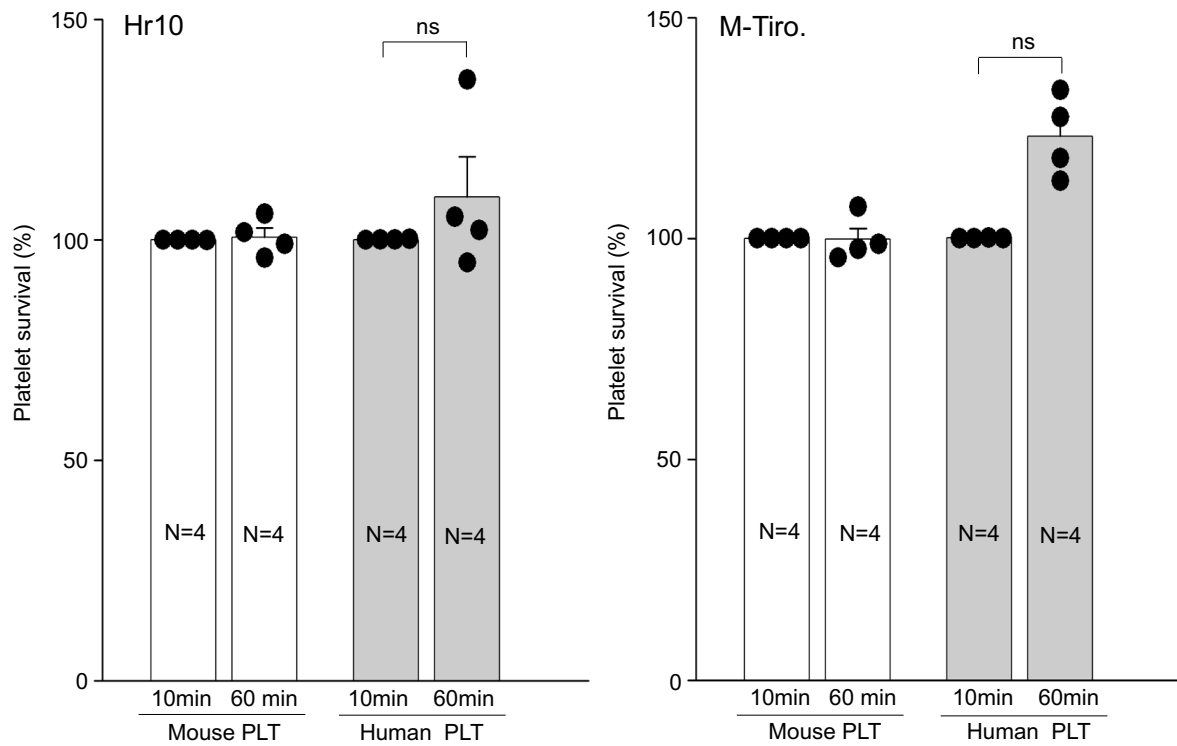

**Supplementary Figure 3. Human platelet clearance in humanized mice.** Humanized mice infused with human platelets were then injected with PBS, Hr10 or M-Tirofiban and platelet count was checked 10 and 60 minutes after injection (mean  $\pm$  S.E; n=4 per group). Mouse platelet counts at 10 min were scaled to 100%. ns, not significant, based on Student two-tailed t-test.



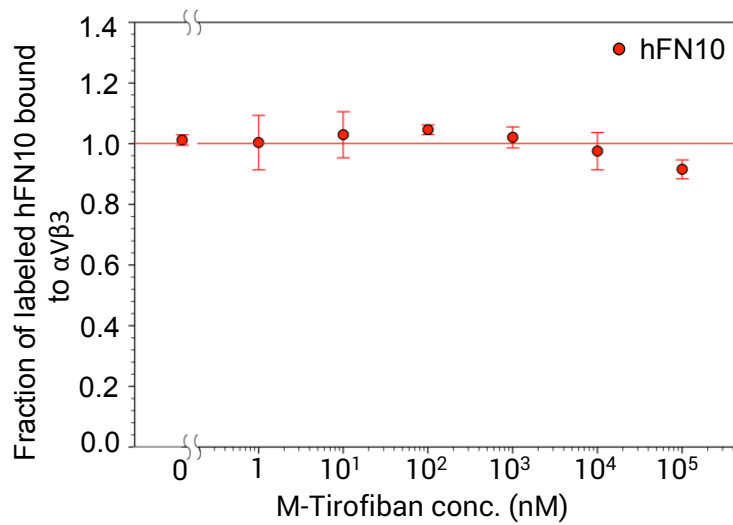

**Supplementary Figure 5. M-Tirofiban does not bind  $\alpha V\beta 3$ .** Graph displaying the residual binding of fluorescently labeled hFN10 to  $\alpha V\beta 3$ -K562 cells in the presence of increasing amounts of unlabeled M-tirofiban. The plot displays the mean and S.E. for three independent experiments along with a line for the mean value. The mean MFI values for each run were used to normalize the data. A two-way Anova to determine the dependence of the FACS run (factor 1) and the M-Tirofiban dose (factor 2) on the MFI for the three experiments indicated no statistically significant dependence ( $p=0.331$ ) on M-Tirofiban dose.

**Supplementary Table 1. Data collection and refinement statistics.**

---

|                                                        |                                                               |
|--------------------------------------------------------|---------------------------------------------------------------|
| <b><i>Data collection</i></b>                          | <b><math>\alpha</math>V<math>\beta</math>3/Hr10</b>           |
| PDB Code                                               | 6NAJ                                                          |
| Beamline                                               | ID19 at APS                                                   |
| Space group                                            | P3 <sub>2</sub> 21                                            |
| Unit cell dimensions (Å, °)                            | $a=b=129.7$ , $c=308.2$ ;<br>$\alpha=\beta=90$ , $\gamma=120$ |
| Resolution range (Å)                                   | 50-3.1                                                        |
| Wavelength (Å)                                         | 0.97932                                                       |
| Total reflections                                      | 1,044,981                                                     |
| Unique reflections                                     | 55,225 (5,444) *                                              |
| Completeness                                           | 100 (100)                                                     |
| Redundancy                                             | 8.2 (8.0)                                                     |
| Molecules in asymmetric unit                           | 1                                                             |
| Average $I/\sigma$                                     | 24.9 (2.0)                                                    |
| $R_{merge}$ (%)                                        | 9.7 (100)                                                     |
| $R_{meas}$ (%)                                         | 10.3 (100)                                                    |
| $R_{sym}$ (%)                                          | 3.6 (38.8)                                                    |
| Wilson $B$ -factor                                     | 59.6                                                          |
| <b><i>Refinement statistics</i></b>                    |                                                               |
| Resolution range (Å)                                   | 49.2-3.1                                                      |
| $R_{factor}$ (%)                                       | 24.9 (33.9)                                                   |
| $R_{free}$ (%) #                                       | 27.4 (38.9)                                                   |
| No. of atoms                                           | 13,498                                                        |
| Protein                                                | 13,137                                                        |
| Water                                                  | 4                                                             |
| Mn <sup>2+</sup>                                       | 8                                                             |
| Glc-NAc                                                | 349                                                           |
| Average $B$ -factor<br>for all atoms (Å <sup>2</sup> ) | 71.1                                                          |
| Protein                                                | 69.4                                                          |
| Ligand/Ion                                             |                                                               |
| Ligand (Hr10)                                          | 104.4                                                         |
| Mn <sup>2+</sup>                                       | 53.8                                                          |
| Water                                                  | 50.5                                                          |
| r.m.s. deviations                                      |                                                               |
| Bond lengths (Å)                                       | 0.004                                                         |
| Bond angles (°)                                        | 1.03                                                          |
| Ramachandran plot                                      |                                                               |
| Most favored (%)                                       | 90.9                                                          |
| Allowed regions (%)                                    | 8.7                                                           |
| Outliers (%)                                           | 0.4                                                           |
| Clashscore (%)                                         | 7.7                                                           |
| Rotamer outliers (%)                                   | 2.4                                                           |

---

\* Values in parentheses are for the highest resolution shell (0.1Å)

#  $R_{free}$  was calculated with 5% of the data
