# Supplementary material for: Structure-guided design of pure orthosteric inhibitors of αIIbβ3 that prevent thrombosis but preserve hemostasis
Source: PubMed Central journal article supplement (PMC6972956; doi:10.1038/s41467-019-13928-2), 2020-01-21
Supplement: 41467_2019_13928_MOESM3_ESM.pdf [file 41467_2019_13928_MOESM3_ESM.pdf]

## Reporting Summary

Nature Research wishes to improve the reproducibility of the work that we publish. This form provides structure for consistency and transparency in reporting. For further information on Nature Research policies, see [Authors & References](#), and the [Editorial Policy Checklist](#).

## Statistics

For all statistical analyses, confirm that the following items are present in the figure legend, table legend, main text, or Methods section.

- n/a | Confirmed
- The exact sample size (n) for each experimental group/condition, given as a discrete number and unit of measurement
- A statement on whether measurements were taken from distinct samples or whether the same sample was measured repeatedly
- The statistical test(s) used AND whether they are one- or two-sided  
*Only common tests should be described solely by name; describe more complex techniques in the Methods section.*
- A description of all covariates tested
- A description of any assumptions or corrections, such as tests of normality and adjustment for multiple comparisons
- A full description of the statistical parameters including central tendency (e.g. means) or other basic estimates (e.g. regression coefficient) AND variation (e.g. standard deviation) or associated estimates of uncertainty (e.g. confidence intervals)
- For null hypothesis testing, the test statistic (e.g. F, t, r) with confidence intervals, effect sizes, degrees of freedom and P value noted  
*Give P values as exact values whenever suitable.*
- For Bayesian analysis, information on the choice of priors and Markov chain Monte Carlo settings
- For hierarchical and complex designs, identification of the appropriate level for tests and full reporting of outcomes
- Estimates of effect sizes (e.g. Cohen's d, Pearson's r), indicating how they were calculated

*Our web collection on [statistics for biology](#) contains articles on many of the points above.*

## Software and code

Policy information about [availability of computer code](#)

- Data collection
1. Aggrolink 8: a commercial software package for control of the ChronoLog model 700 aggregometer (Havertown, PA).
  2. Diffraction data was collected at ID-19 of APS, indexed, integrated, scaled by HKL2000 65, solved by molecular replacement in PHASER and refined in Phenix.
- Data analysis
- SigmaPlot: a commercial software package for scientific graphing and data analysis (Systat Software, San Jose, CA)

For manuscripts utilizing custom algorithms or software that are central to the research but not yet described in published literature, software must be made available to editors/reviewers. We strongly encourage code deposition in a community repository (e.g. GitHub). See the Nature Research [guidelines for submitting code & software](#) for further information.

## Data

Policy information about [availability of data](#)

All manuscripts must include a [data availability statement](#). This statement should provide the following information, where applicable:

- Accession codes, unique identifiers, or web links for publicly available datasets
- A list of figures that have associated raw data
- A description of any restrictions on data availability

All relevant data are included in the paper and/or its supplementary information files. The source data underlying Figs. 1c-f; 3e-f; 4a, b, c, e; 5c-h, 6a-c and Supplementary Figs 3 and 5 are provided as a Source Data file. The atomic coordinates and structure factors for the reported crystal structure of  $\alpha\text{v}\beta\text{3}/\text{Hr10}$  complex have been deposited in the Protein Data Bank (PDB) under the accession code 6NAJ (<http://www.rcsb.org/pdb/results/results.do?tab=showUnreleased&q=6NAJ>), where they can be obtained free of charge.

- Cell line source(s)
- (ref.2477)  
K562 cells stably expressing  $\alpha\text{IIb}\beta\text{3}$  were previously described. J Mol Recognit 24, 127-135 (2011)(ref 677777).
- Authentication
- Original K562 cell were obtained from ATCC.
- Mycoplasma contamination
- K562 cell line was not tested for Mycoplasma.
- Commonly misidentified lines (See [IACUC](#) register)
- Name any commonly misidentified cell lines used in the study and provide a rationale for their use.

## Animals and other organisms

Policy information about [studies involving animals](#): [ARRIVE guidelines](#) recommended for reporting animal research

- Laboratory animals
- NSG mice were used, age 10-12 weeks. Males were used for the cremasteric muscle injury model and female mice used for the bleeding model.
- Wild animals
- This study did not use wild animals.
- Field-collected samples
- This study did not involve samples collected in the field.
- Ethics oversight
- Animal protocol was approved by the Children's Hospital of Philadelphia Internal Review Board in accord with the Helsinki Principles.

Note that full information on the approval of the study protocol must also be provided in the manuscript.

## Human research participants

Policy information about [studies involving human research participants](#)

- Population characteristics
- Blood was obtained from healthy donor males and females.
- Recruitment
- Random healthy volunteers not taking anti-platelet drugs the previous 10 days who agreed to participate in the study were used as donors.
- Ethics oversight
- Informed written consent was obtained under protocols approved by the Children's Hospital of Philadelphia and Mass General Hospital Internal Review Boards in accord with the Helsinki Principles.

Note that full information on the approval of the study protocol must also be provided in the manuscript.

## Flow Cytometry

## Plots

- Confirm that:
- The axis labels state the marker and fluorochrome used (e.g. CD4-FITC).
- The axis scales are clearly visible. Include numbers along axes only for bottom left plot of group (a 'group' is an analysis of identical markers).
- All plots are contour plots with outliers or pseudocolor plots.
- A numerical value for number of cells or percentage (with statistics) is provided.

## Methodology

- Sample preparation
- K562 or platelets were stained with the primary/secondary antibodies on ice and fixed in 2% paraformaldehyde.
- Instrument
- FACSCalibur or BD-LSRII flow cytometers (BD Biosciences).
- Software
- FlowJo software. FACS Data were presented as histograms or graphs based on the calculated MFIs.
- Cell population abundance
- No sorting was performed. 10,000 cells were counted in each case.
- Gating strategy
- Representative figures of the gating strategy for FACS experiments is now provided in the Supplementary Figure 2
- Tick this box to confirm that a figure exemplifying the gating strategy is provided in the Supplementary Information.

## Field-specific reporting

Please select the one below that is the best fit for your research. If you are not sure, read the appropriate sections before making your selection.

- Life sciences  Behavioural & social sciences  Ecological, evolutionary & environmental sciences

For a reference copy of the document with all sections, see [nature.com/documents/hr-reporting-summary.html](https://www.nature.com/documents/hr-reporting-summary.html)

## Life sciences study design

All studies must disclose on these points even when the disclosure is negative.

- Sample size
- Sample size calculations used formulas by LaMorte, W. (Ref 73), assuming that hemostasis is preserved in 80% of Hr10 or M-Trofinban-treated mice but only 5% of Eptifibatid or Trofinban-treated mice (projections supported by published reports of similar studies using Eptifibatid and Trofinban, and the predictive clot retraction data).
- Data exclusions
- No data were excluded from the analysis of samples.
- Replication
- All attempts made to replicate samples were successful.
- Randomization
- Allocation of animals was random.
- Blinding
- Blinding was not done since one investigator experienced in either the thrombosis or the bleeding humanized mouse models carried out the respective study.

## Reporting for specific materials, systems and methods

We require information from authors about some types of materials, experimental systems and methods used in many studies. Here, indicate whether each material, system or method listed is relevant to your study. If you are not sure if a list item applies to your research, read the appropriate section before selecting a response.

- | Materials & experimental systems                                | Methods                                                    |
|-----------------------------------------------------------------|------------------------------------------------------------|
| n/a   Involved in the study                                     | n/a   Involved in the study                                |
| <input checked="" type="checkbox"/> Antibodies                  | <input checked="" type="checkbox"/> chIP-seq               |
| <input checked="" type="checkbox"/> Eukaryotic cell lines       | <input type="checkbox"/> Flow cytometry                    |
| <input checked="" type="checkbox"/> Palaeontology               | <input checked="" type="checkbox"/> MRI-based neuroimaging |
| <input checked="" type="checkbox"/> Animals and other organisms |                                                            |
| <input checked="" type="checkbox"/> Human research participants |                                                            |
| <input checked="" type="checkbox"/> Clinical data               |                                                            |

## Antibodies

- Antibodies used
1. Alexa Fluor 488-conjugated mAb against human CD62P (Santa Cruz), Cat# sc-8419; Clone: CTB201; Lot# H151
  2. Alexa Fluor 488-conjugated mAb against human CD63 (Santa Cruz), Cat# sc-5275; Clone: M1X-49; Lot# A2517
  3. Alexa Fluor 647-conjugated anti-human CD42b/CP1b mAb (R&D), Cat# FA-B40679; Lot# 1491694
  4. APC-labeled goat anti-mouse Fc-specific antibody (Jackson), Cat# 115-135-07; Lot# 134469
  5. Alexa Fluor-488 labeled (Fab')<sub>2</sub> fragment of mouse anti-human CD41a (Catalogue#555465) from BD Biosciences.
  6. Alexa Fluor-647 rat anti-mouse CD41a F(ab')<sub>2</sub> (Catalogue#624101) from BD Biosciences.
  7. AP3 hybridoma (from ATCC, Catalogue#ATCC HB<sup>9</sup>-242)
  8. APS obtained from Peter Newman, Univ. Wisconsin
  9. LIBS-1 (obtained from Mark Ginsberg, USCSD)
  10. PT-25-2 (from Makoto Handa, Keio University, Tokyo, Japan)
- Validation
- Abx 1-6 above are validated by the manufacturer.
7. AP3 (JBC, 2014, 289:23256-63)
  - 8.9. APS, LIBS-1 (ref 24)
  10. PT-25-2 (Thromb Haemost. 1996;76: 1038-1046)

## Eukaryotic cell lines

Policy information about [cell lines](#)

- Cell line source(s)
- K562 cells stably expressing human  $\alpha\text{v}\beta\text{3}$  cells have been previously described. Nat Struct Mol Biol 21, 383-388 (2014)
